# Supplementary material
Source: Research Square preprint supplement (doi:10.21203/rs.3.rs-8574332/v1)
Supplement: Supplementary file 1 [file 1aef839b95f693b7007a9648.docx]

**Supplementary Materials**

**for**

### Structural Basis of Transcriptional Coactivator PC4 Binding to a Platinum Crosslinked Double-Stranded Oligonucleotide

Yuanyuan Wang,1,3,5,9 Min Zang,2,9 Zhifeng Du,1,5,7,9 Yinzhu Hou,1,5 Wei Zheng,1 Juan Qiao,1 Kui Wu,8 Qun Luo,1,5 Li Qi,1,5 Yao Zhao,1,5,10 Hao Dong2,10 and Fuyi Wang1,4,5,6,10

*1 Beijing National Laboratory for Molecular Science; CAS Key Laboratory of Analytical Chemistry for Living Biosystems, Institute of Chemistry, Chinese Academy of Sciences, Beijing 100190, P.R. China.*

*2 State Key Laboratory of Analytical Chemistry for Life Science, Kuang Yaming Honors School, Chemistry and Biomedicine Innovation Center (ChemBIC), & Institute for Brain Sciences, Nanjing University, Nanjing, 210023, China.*

*3 College of Pharmacy, Hebei University of Chinese Medicine, Shijiazhuang 050200, China.*

*4 National Centre for Mass Spectrometry in Beijing; Beijing 100049, P.R. China*

*5 University of Chinese Academy of Sciences, Beijing 100049, P.R. China.*

*6 Basic Medical College, Shandong University of Chinese Traditional Medicine, Jinan 250355, P.R. of China.*

*7 School of Pharmacy, Huazhong University of Science and Technology, Wuhan, Hubei, 430030, P.R. China.*

*8 Key Laboratory of Hubei Province for Coal Conversion and New Carbon Materials; School of Chemistry and Chemical Engineering, Wuhan University of Science and Technology, Wuhan, 430081, P.R. China.*

9 These authors contributed equally: Yuanyuan Wang, Min Zang, Zhifeng Du.

10 E-mail: fuyi.wang@iccas.ac.cn; donghao@nju.edu.cn; yaozhao@iccas.ac.cn.

**Table of Contents**

**Figure S1 – S23.**

**Table S1 – S2.**

**References**

**Figure S1.** Characterization of 1,3-*trans*-PtTz crosslinked oligodeoxynucleotide (ODN) **I** by HPLC (a) and ESI-MS (b). (a) Chromatogram of reaction mixture of strand **I** with *trans*-PtTz at 310 K for 24 h. Fraction **A** is free strand **I** and fraction **B** mono-platinated ODN **I** by *trans*-PtTz; (b) Mass spectrum of fraction **B** in (a) and the insert shows the isotopic model of doubly-charged ion of platinated strand **I**, [1,3-*trans*-PtTz- **I**]4−.

**Figure S2.** Mass spectra of (A) non-deuterated PC4, (B) deuterated PC4, (C) deuterated PC4 after incubated with unmodified dsODN **III**, and (D) deuterated PC4 after incubation with the 1,3-GTG *trans*-PtTz intrastrand crosslinked dsODN (1,3-*trans*-PtTz-**III**) .

**Figure S3.** Sequence coverage map of peptic peptides of PC4 identified by LC-ESI-MS. The secondary structural elements of β-sheets and α-helix determined by X-ray crystallography (M63 – L127) 1 (PDB code: 2C62) are also shown above the sequence. Black double-arrow lines represent identified peptides (Pep1 – Pep20) and arrows refer to N-terminal and C-terminal of each peptide.

**Figure S4.** (a, b) Kinetic curves of HDX of peptic peptides Pep1 and Pep2 arising from apo-PC4 (square) and holo-PC4 (ligated with 1,3-*trans*-PtTz-**III**) (circle). (c, d) Mass spectra of (i) non-deuterated and (ii and iii) deuterated peptides Pep1 and Pep2 derived from the apo-PC4 (ii) and the holo-PC4 (iii) incubated in D2O buffer for 1 min and 120 min, respectively. The vertical green lines correspond to the centroid *m/z* of each deuterated peptide.

**Figure S5.** (a, b) Kinetic curves of HDX of peptic peptides Pep3 and Pep4 arising from apo-PC4 (square) and holo-PC4 (circle). (c, d) Mass spectra of (i) non-deuterated and (ii and iii) deuterated peptides Pep3 and Pep4 derived from apo-PC4 (ii) and holo-PC4 (iii) incubated in D2O buffer for 1 min and 120 min, respectively. The vertical green lines correspond to the centroid *m/z* of each deuterated peptide.

**Figure S6.** (a, b) Kinetic curves of HDX of peptic peptides Pep5 and Pep7 arising from apo-PC4 (square) and holo-PC4 (circle). (c, d) Mass spectra of (i) non-deuterated and (ii and iii) deuterated peptides Pep5 and Pep7 derived from the apo-PC4 (ii) and the holo-PC4 (iii) incubated in D2O buffer for 1 min and 120 min, respectively. The vertical green lines correspond to the centroid *m/z* of each deuterated peptide.

**Figure S7.** (a, b) Kinetic curves of HDX of peptic peptides Pep8 and Pep9 arising from apo-PC4 (square) and holo-PC4 (circle). (c, d) Mass spectra of (i) non-deuterated and (ii and iii) deuterated peptides Pep8 and Pep9 derived from apo-PC4 (ii) and holo-PC4 (iii) incubated in D2O buffer for 1 min and 120 min, respectively. The vertical green lines correspond to the centroid *m/z* of each deuterated peptide.

**Figure S8.** (a, b) Kinetic curves of HDX of peptic peptides Pep10 and Pep11 arising from apo-PC4 (square) and holo-PC4 (circle). (c, d) Mass spectra of (i) non-deuterated and (ii and iii) deuterated peptides Pep10 and Pep11 derived from apo-PC4 (ii) and holo-PC4 (iii) incubated in D2O buffer for 1 min and 120 min, respectively. The vertical green lines correspond to the centroid *m/z* of each deuterated peptide.

**Figure S9.** (a, b) Kinetic curves of HDX of peptic peptides Pep12 and Pep14 arising from apo-PC4 (square) and holo-PC4 (circle). (c, d) Mass spectra of (i) non-deuterated and (ii and iii) deuterated peptides Pep12 and Pep14 derived from apo-PC4 (ii) and holo-PC4 (iii) incubated in D2O buffer for 1 min and 120 min, respectively. The vertical green lines correspond to the centroid *m/z* of each deuterated peptide.

**Figure S10.** (a, b) Kinetic curves of HDX of peptic peptides Pep15 and Pep17 arising from apo-PC4 (square) and holo-PC4 (circle). (c, d) Mass spectra of (i) non-deuterated and (ii and iii) deuterated peptides Pep15 and Pep17 derived from apo-PC4 (ii) and holo-PC4 (iii) incubated in D2O buffer for 1 min and 120 min, respectively. The vertical green lines correspond to the centroid *m/z* of each deuterated peptide.

**Figure S11.** (a, b) Kinetic curves of HDX of peptic peptides Pep18 and Pep19 arising from apo-PC4 (square) and holo-PC4 (circle). (c, d) Mass spectra of (i) non-deuterated and (ii and iii) deuterated peptides Pep18 and Pep19 derived from apo-PC4 (ii) and holo-PC4 (iii) incubated in D2O buffer for 1 min and 120 min, respectively. The vertical green lines correspond to the centroid *m/z* of each deuterated peptide.

**Figure S12.** (a) Kinetic curves of HDX of peptic peptides Pep20 arising from apo-PC4 (square) and holo-PC4 (circle). (b) Mass spectra of (i) non-deuterated and (ii and iii) deuterated peptides Pep20 derived from apo-PC4 (ii) and holo-PC4 (iii) incubated in D2O buffer for 1 min and 120 min, respectively. The vertical green lines correspond to the centroid *m/z* of each deuterated peptide.


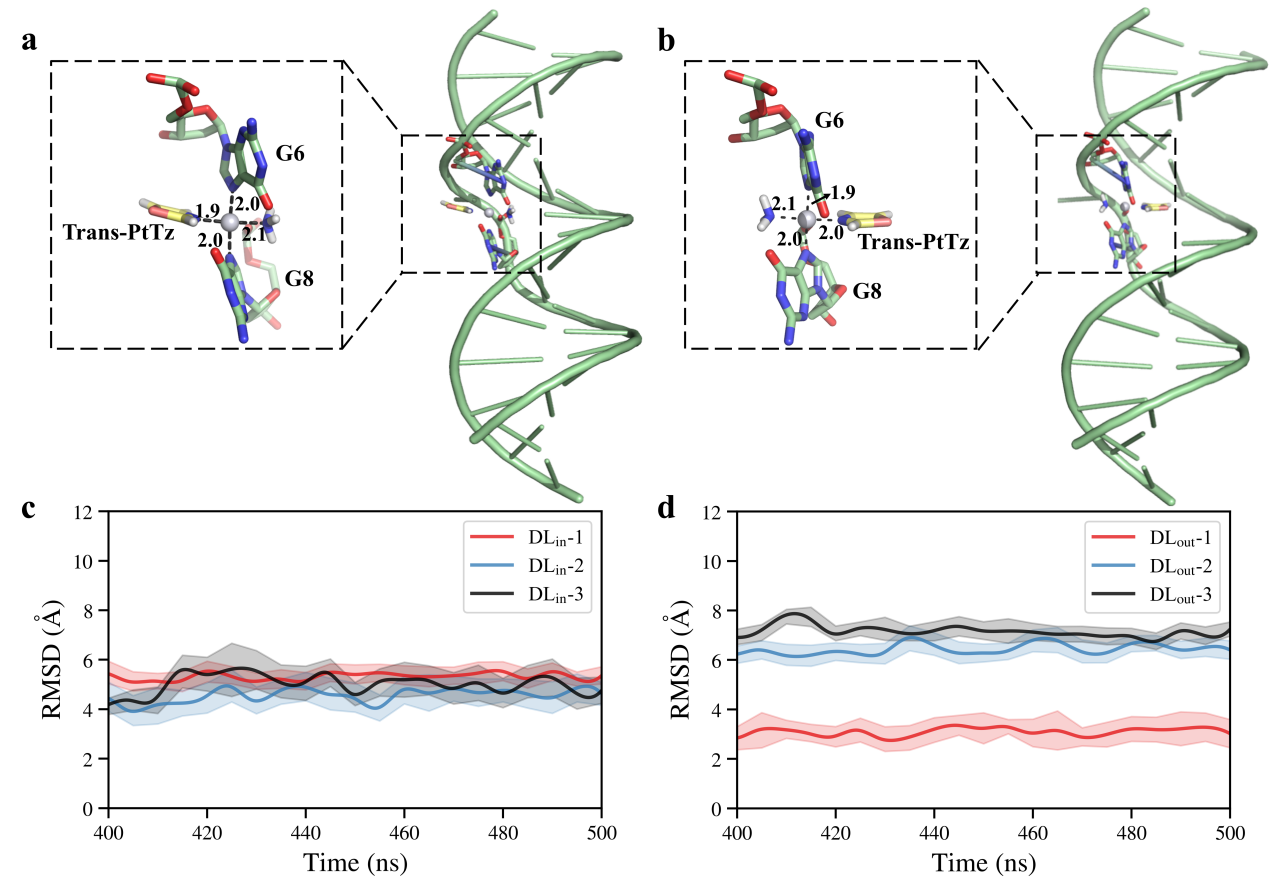


**Figure S13.** The initial structures and conformation changes of 1,3-*trans*-PtTz-III. (a) The DLin (a) and the DLout (b) configurations of the 1,3-*trans*-PtTz-III complex. Pt-related coordination bonds are indicated by dashed lines (in Å). The root mean squared deviations (RMSD) of the protein backbone in three parallel simulations for the DLin (c) and the DLout (d) configurations.


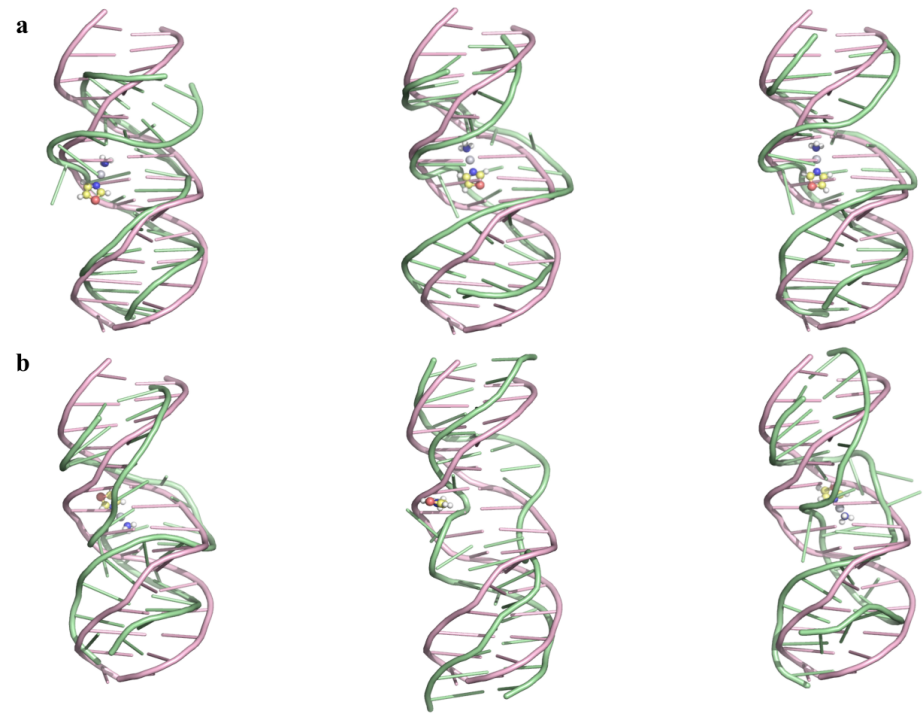


**Figure S14.** The comparison between the B-form ODN III model (light pink) and three parallel (a) DLin or (b) DLout models (pale green)..


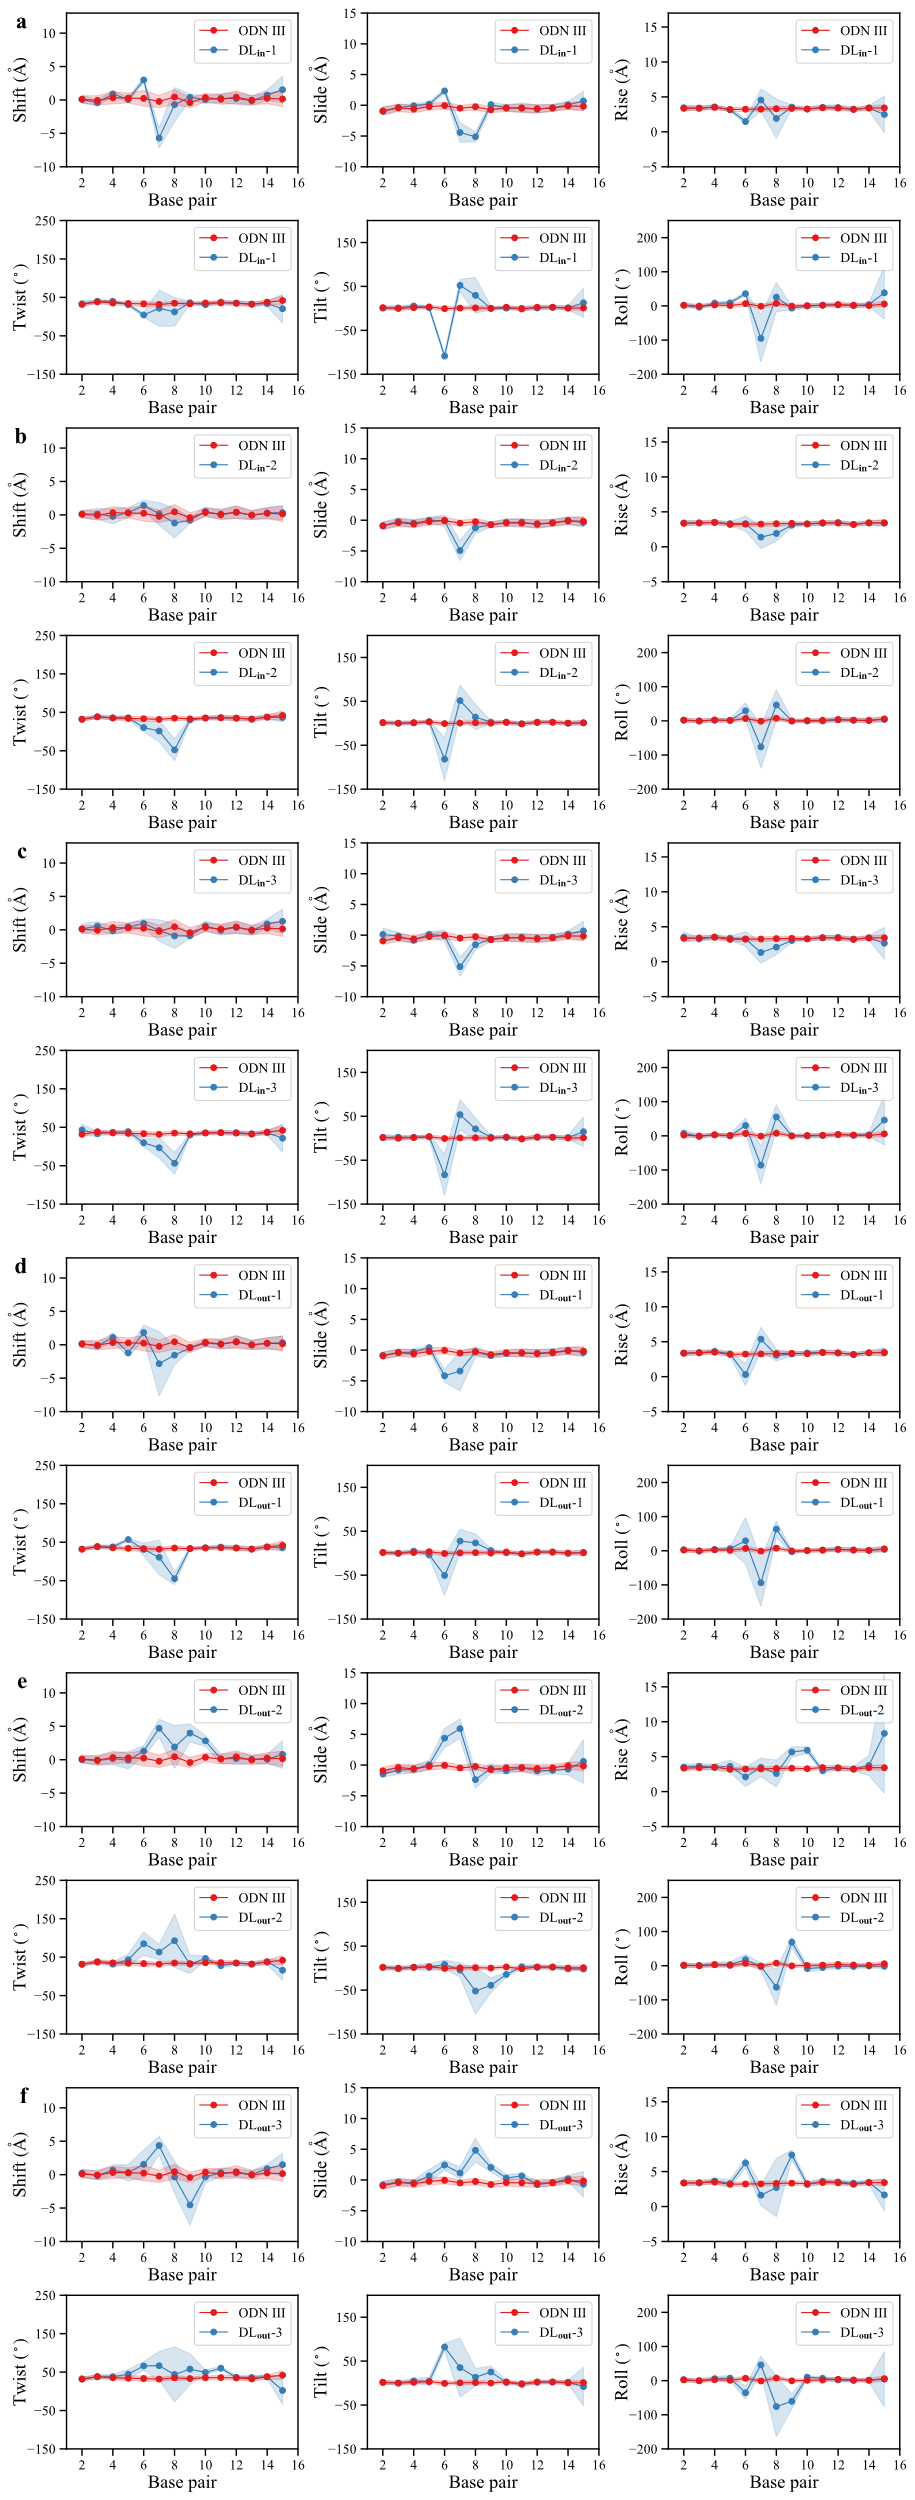

(*continued on next page*)


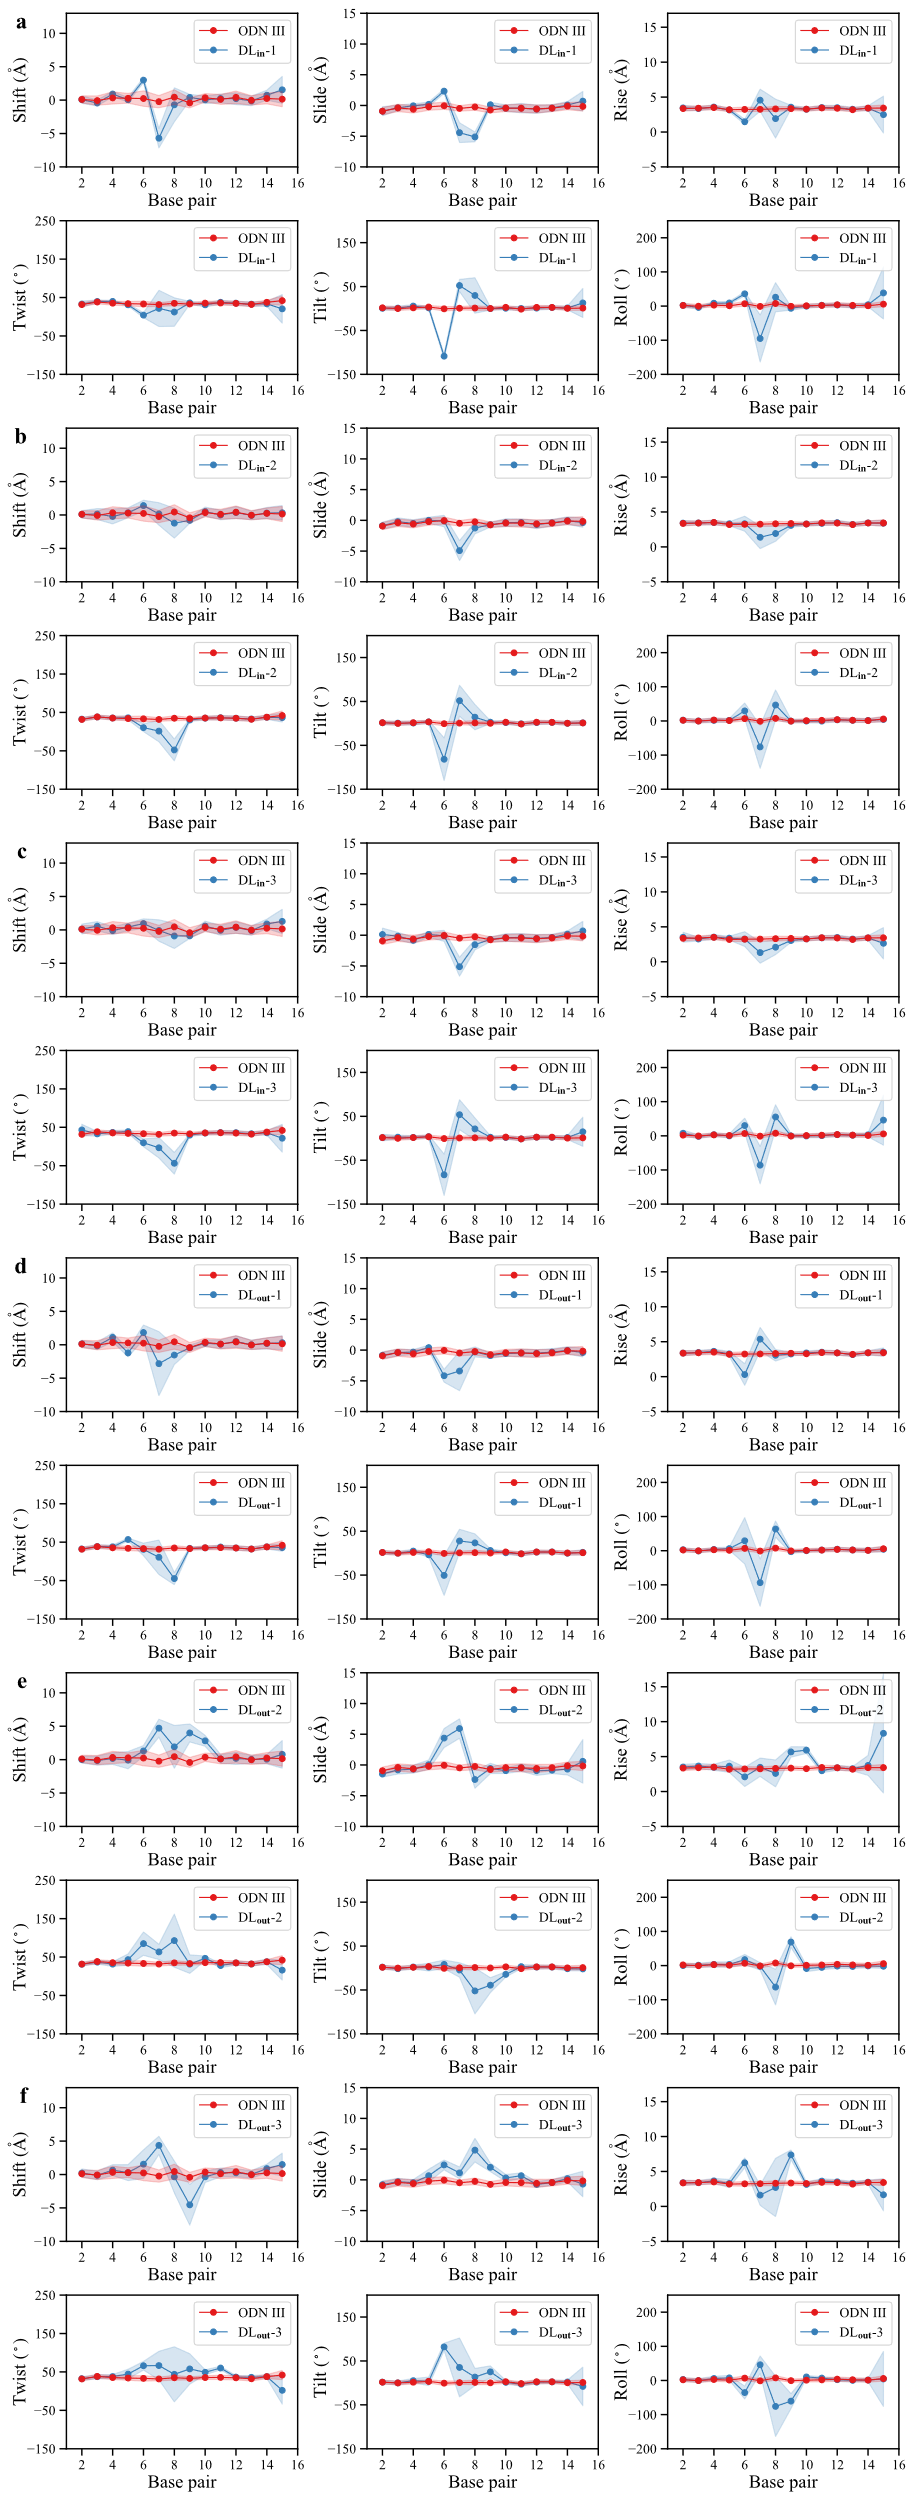

**Figure S15.** Inter-base pair parameters versus base pair number for ODN III (red) and six DL complexes (blue). (a), (b), (c) showing comparisons between ODN III and DLin-1, DLin-2, and DLin-3, respectively; (d), (e), (f) showing comparisons between ODN III and DLout-1, DLout-2, and DLout-3, respectively.


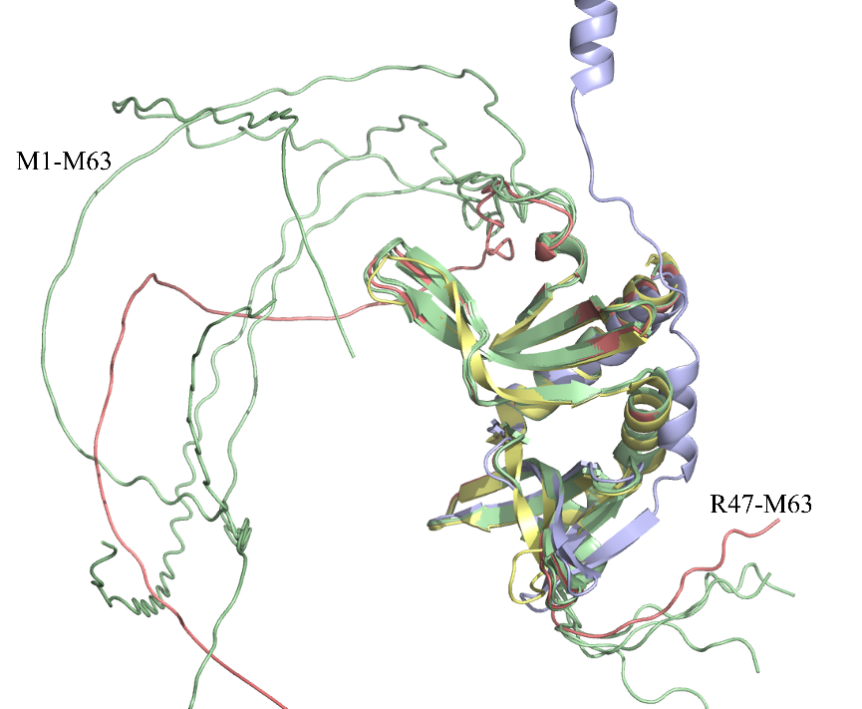


**Figure S16.** Structural prediction using AlphaFold2 and tFold. Both methods show consistent predictions for the M63-L127 segment, which are very close to the experimentally determined structure (PDB entry 2C62.pdb). However, tFold predicted the N-terminal disordered structure as a helix (in light blue); five predictions from AlphaFold2 (pale green, red and deepsalmon) show that the N-terminal segment (M1-M63) is disordered.


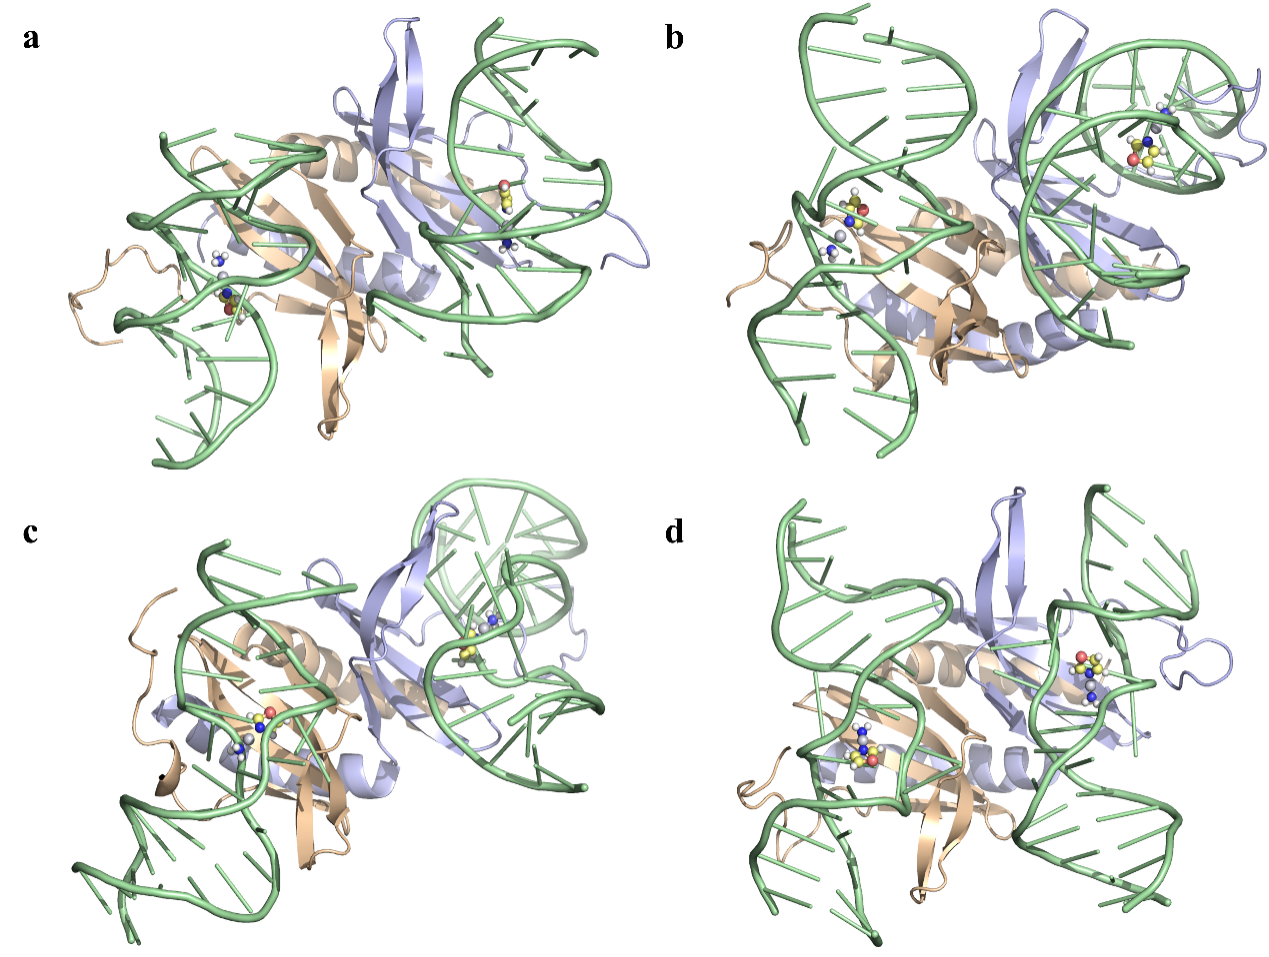


**Figure S17.** The representative structures of four holo-PC4 (1,3-*trans*-PtTz-III-PC4) complexes. The PC4 protein monomer 1, the PC4 protein monomer 2 and the two bound *trans*-PtTz-III for (a) holo-PC4-1 and (b) holo-PC4-2 and (c) holo-PC4-3 and (d) holo-PC4-4 are shown in wheat, light blue and pale green cartoon, respectively. *Trans*-PtTz is shown in ball-stick-model.

Based on the differences in binding modes, holo-PC4-1 to holo-PC4-4 are briefly described below. Holo-PC4-1: PC4 binds to the major groove of DLout and the DNA strand binding *trans*-PtTz is close to the PC4 dimer interface; holo-PC4-2, PC4 bound to the minor groove of DLout and the DNA strand binding *trans*-PtTz is away from the PC4 dimer interface; holo-PC4-3, PC4 bound to the major groove of DLin and DNA strand binding *trans*-PtTz is away from the PC4 dimer interface; holo-PC4-4, PC4 bound to the minor groove of DLin and DNA strand binding *trans*-PtTz is away from the PC4 dimer interface.


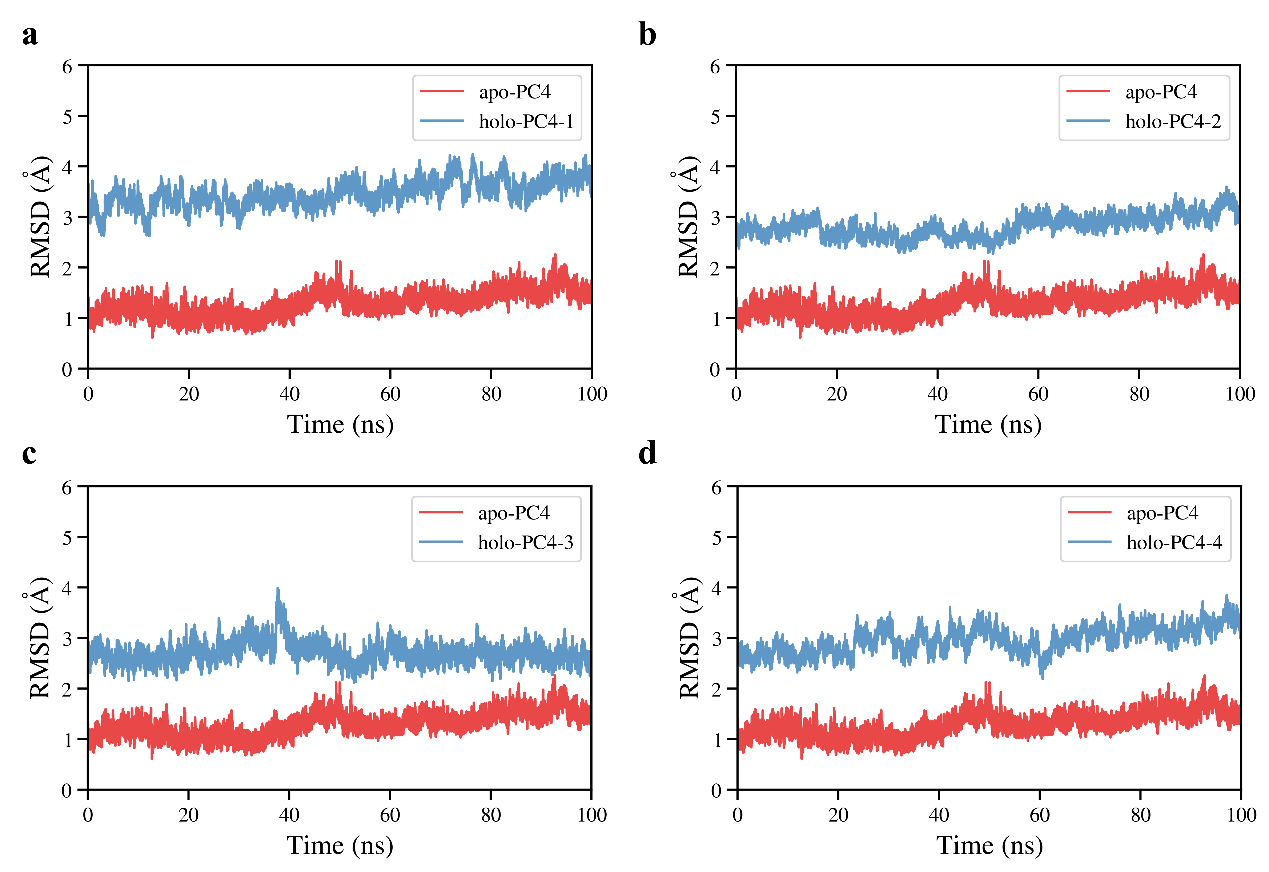


**Figure S18.** The backbone RMSD (root mean square deviation) of apo-PC4 (in red) protein and holo-PC4-1 (a), holo-PC4-2 (b), holo-PC4-3 (c), and holo-PC4-4 (d) complexes (in blue) in 100 ns MD simulations.


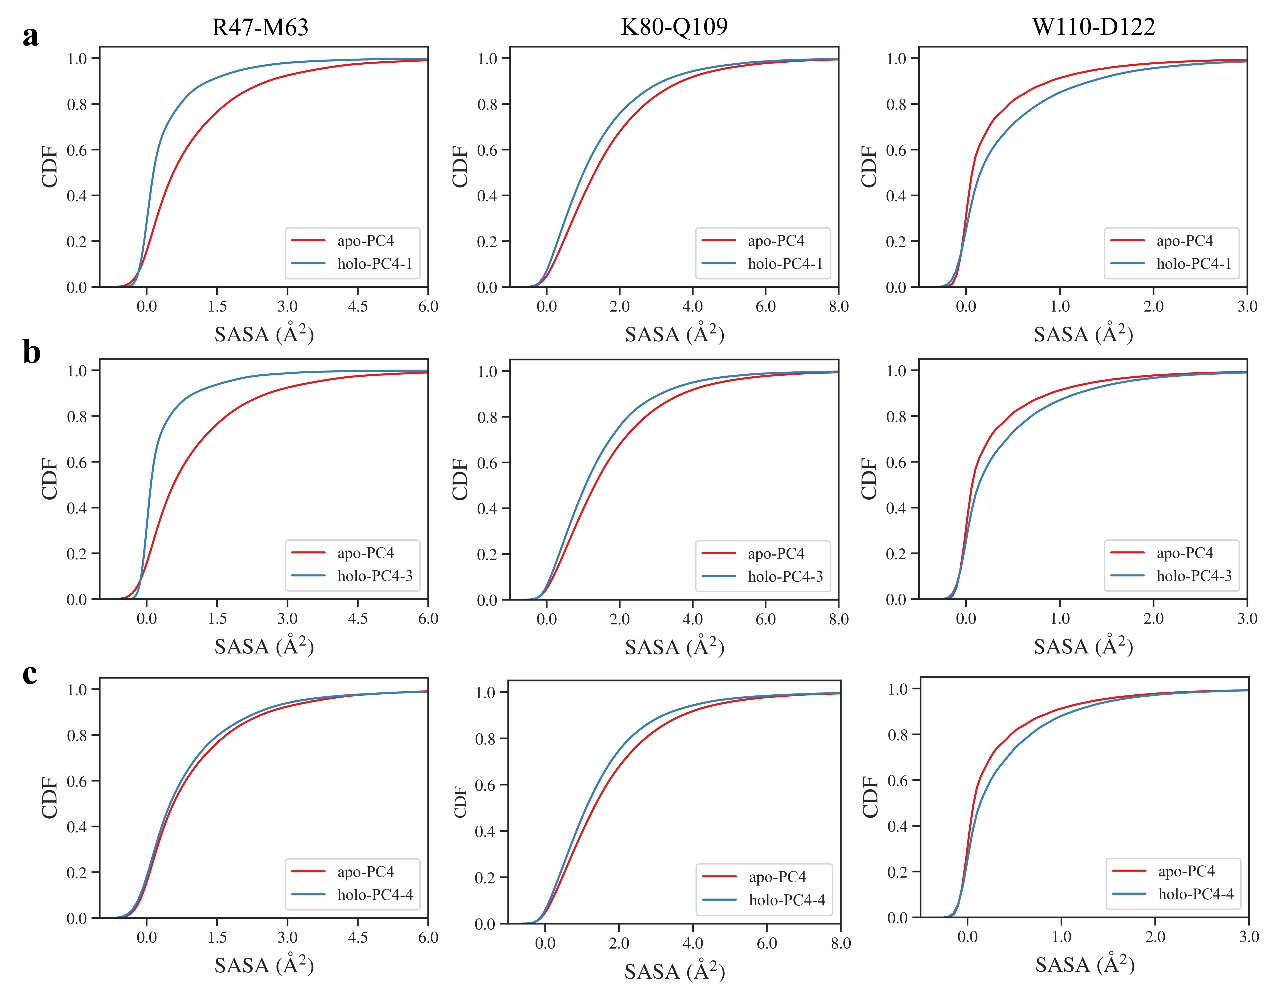


**Figure S19.** The cumulative distribution functions of SASA (solvent accessible surface area) of apo-PC4 (red) and the R47-M63 (N-terminal disordered binding region, left panel), K80-Q109 (β-sheet binding region, middle panel) and W110-D122 (right panel) in the (a) holo-PC4-1, (b) holo-PC4-3, and (c) holo-PC4-4 complexes.


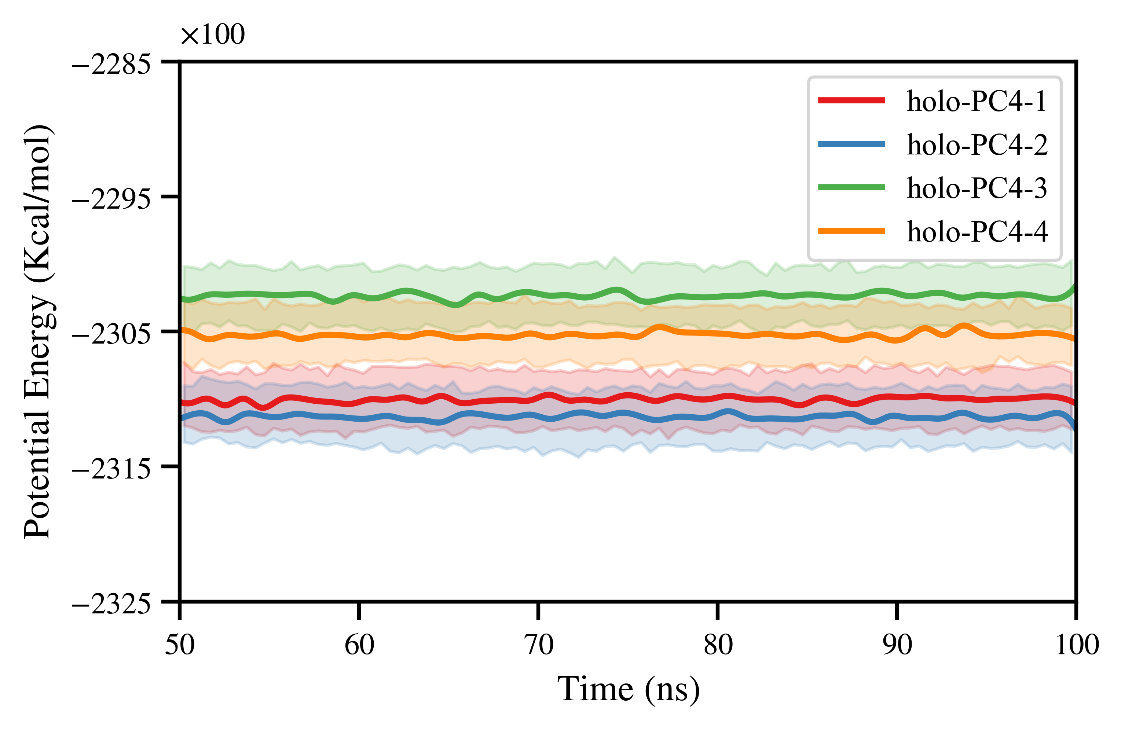


Figure S20. The potential energies of four holo-PC4 complexes, holo-PC4-1, holo-PC4-2, holo-PC4-3, holo-PC4-4 colored in red, blue, green, and orange, respectively.


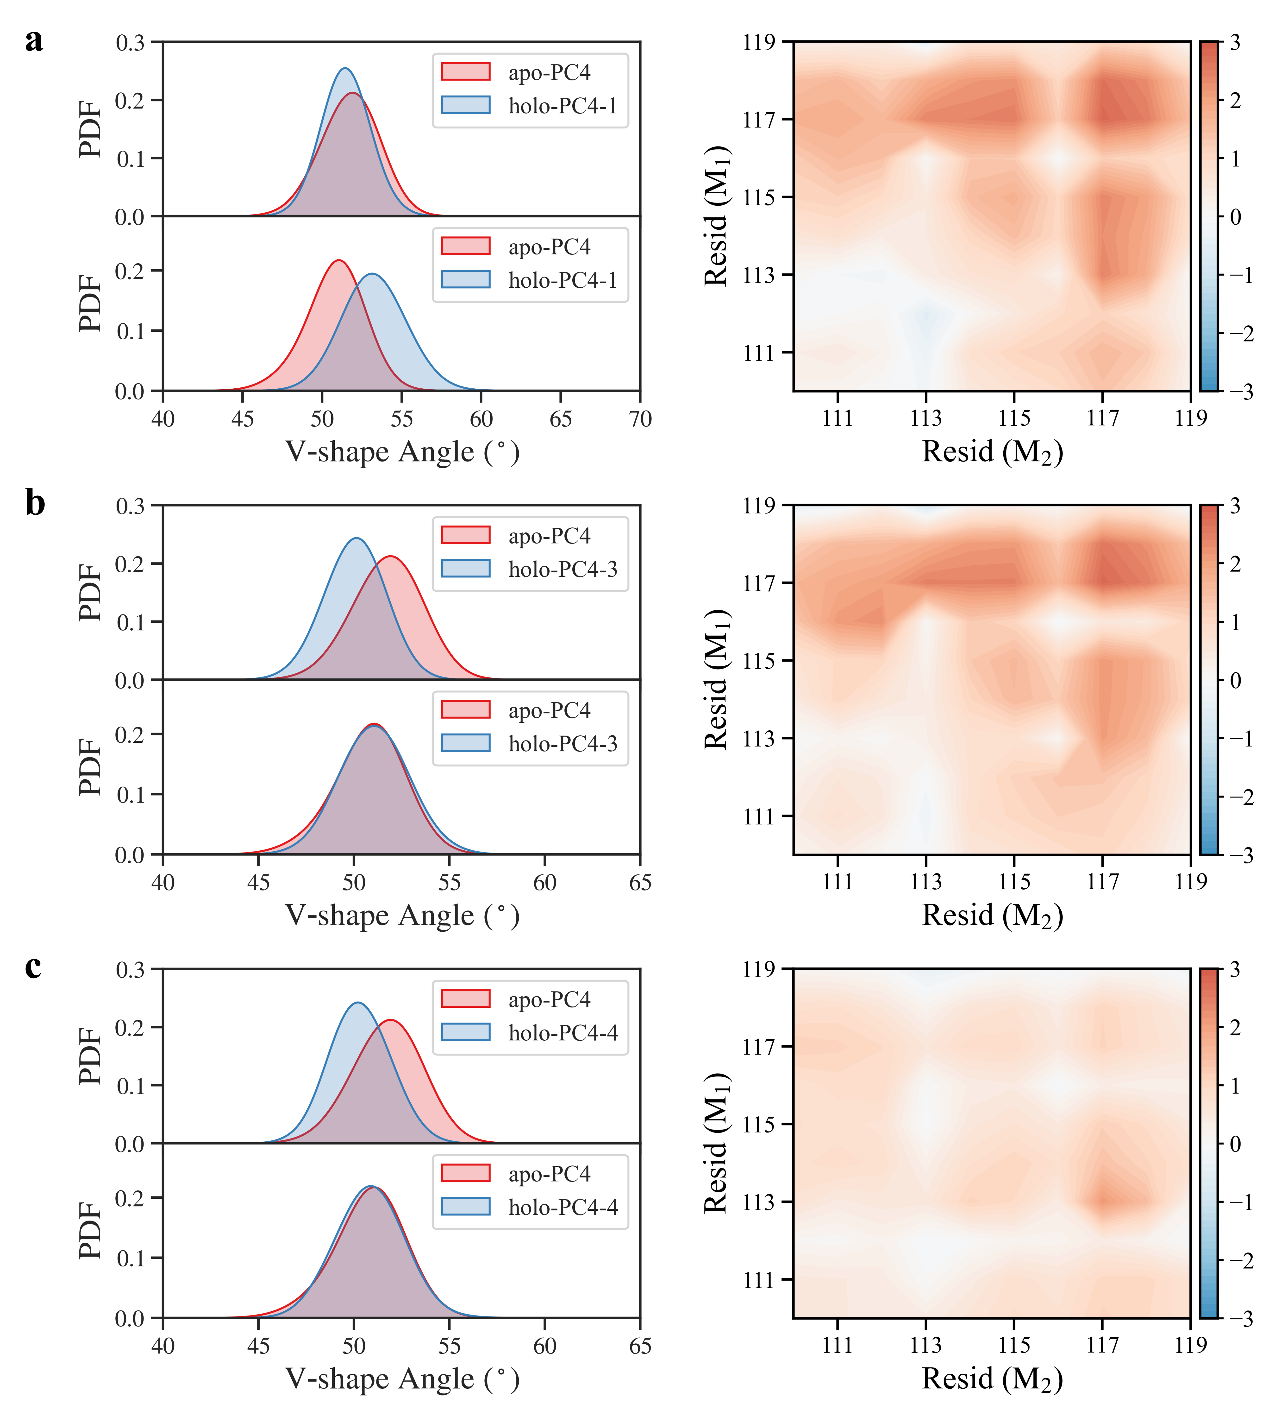


**Figure S21.** The probability density distribution of V-shaped angle of apo-PC4 and (a) holo-PC4-1, (b) holo-PC4-3, (c) holo-PC4-4 (left panel). The corresponding matrix of closest distance differences between subunits are shown in the right panel.


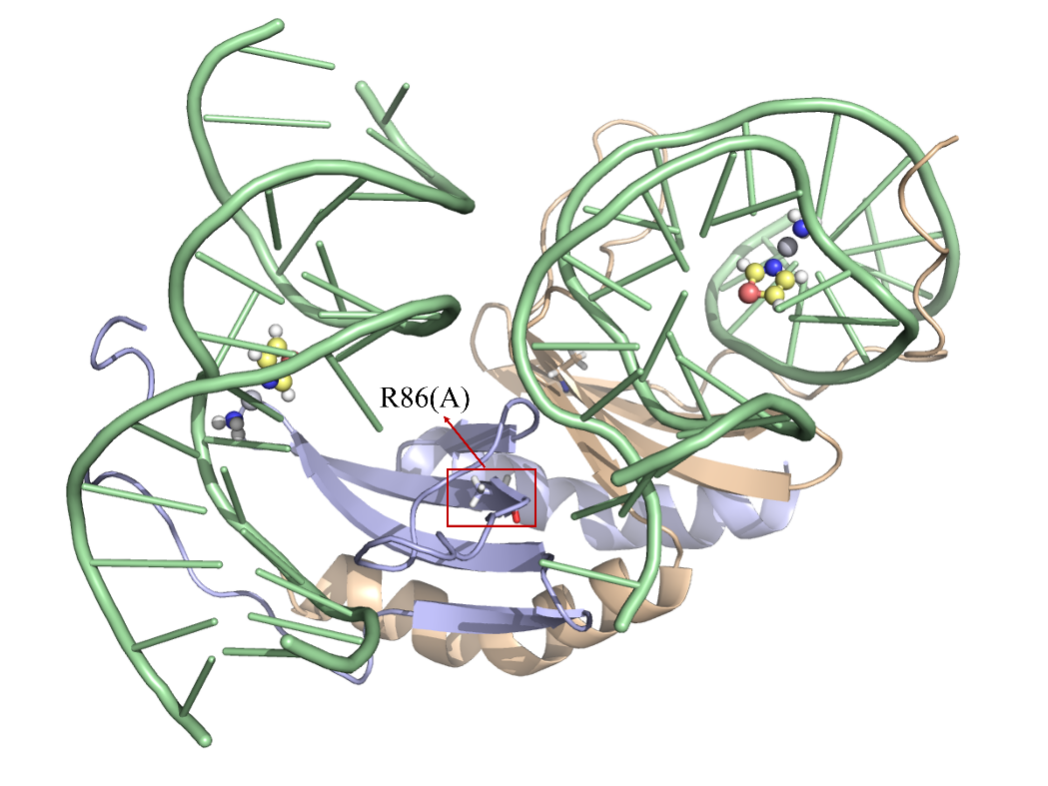


**Figure S22.** The representative structure of mutant PC4R86A in holo-PC4-2 complex. The two subunits of PC4 and the two bound *trans*-PtTz-III are shown in wheat, light blue, and pale green cartoon, respectively. *Trans*-PtTz is shown in the ball-stick-model.

**Figure S23.** MS/MS spectra for the tryptic peptides containing amino residue 86 of (a) PC4wt and (b) PC4R86G.

**Table S1.** All energies are in kcal/mol. The squared deviations for each data is shown.

|  | ∆*G*ele | ∆*G*vdw | ∆*G*SA | ∆*G*PB | ∆*G*binding |
| --- | --- | --- | --- | --- | --- |
| holo-PC4-1 | -6384.18±183.43 | -244.64±10.48 | 6573.00±176.42 | -32.86±0.98 | -88.68±24.86 |
| holo-PC4-2 | -7052.27±200.42 | -257.00±12.53 | 7205.91±192.22 | -36.39±1.05 | -139.64±24.49 |
| holo-PC4-3 | -4954.47±148.27 | -296.15±14.20 | 5225.72±143.28 | -36.49±1.20 | -61.38±24.81 |
| holo-PC4-4 | -6624.05±203.29 | -230.16±13.22 | 6808.30±195.09 | -32.67±1.19 | -78.57±22.94 |
| mut-holoPC4-1 | -4636.78±314.61 | -220.86±11.93 | 4838.85±308.72 | -29.92±0.91 | -48.72±22.83 |
| mut-holoPC4-2 | -5080.99±199.93 | -241.72±12.94 | 5233.27±197.24 | -32.63±1.53 | -122.06±20.41 |
| mut-holoPC4-3 | -3342.33±141.00 | -328.69±12.05 | 3678.52±130.39 | -39.35±0.89 | -31.85±29.55 |
| mut-holoPC4-4 | -4438.13±220.31 | -214.15±12.24 | 4682.56±209.28 | -29.66±1.45 | 0.63±27.47 |

**Table S2.** Hydrogen bond formation, and occupancy of the holo-PC4-1, holo-PC4-2, holo-PC4-3, and holo-PC4-4 models. The first left column in each part is bond location in the format of “acceptor atom@ODN base-donor atom@amino acid”. *O*w/o, *O*direct, and *Oi*ndirect represent occupancy of no hydrogen bond, direct hydrogen bond and indirect hydrogen bond, respectively.

| Monomer 1 | *O*w/o  (%) | *O*direct  (%) | *O*indirect  (%) | Monomer 2 | *O*w/o  (%) | *O*direct  (%) | *O*indirect  (%) |
| --- | --- | --- | --- | --- | --- | --- | --- |
| holo-PC4-1 | | | | | | | |
| OP@21-NH@Arg75 | 18.1 | 25.8 | 56.1 | OP@A21-NH@Arg75 | 42.1 | 5.7 | 52.1 |
| OP@T4-NZ@Lys78 | 42.8 | 27.6 | 29.6 | OP@A22-NH@Arg75 | 4.3 | 44.0 | 51.7 |
| OP@T5-NH@Arg86 | 44.9 | 0.0 | 55.1 | OP@G23-NZ@Lys78 | 32.7 | 23.3 | 43.9 |
| OP@G6-NH@Arg86 | 36.0 | 0.0 | 64.0 | OP@T5-NH@Arg86 | 0.12 | 71.6 | 28.2 |
| OP@G6-NH@Arg100 | 11.7 | 22.7 | 65.6 | OP@G6-NH@Arg100 | 13.3 | 53.7 | 33.0 |
| OP@T7-NH@Arg100 | 1.7 | 50.2 | 48.1 | OP@T5(chain1)-NZ@Lys101 | 2.5 | 53.2 | 44.3 |
| OP@G30(chain2)-NH@Arg100 | 6.2 | 61.7 | 32.0 |  |  |  |  |
| OP@T4(chain2)-NZ@Lys101 | 9.1 | 71.6 | 19.3 |  |  |  |  |
| holo-PC4-2 | | | | | | | |
| | OP@G6-NZ@Lys78 | 26.1 | 73.0 | 0.9 | OP@A19-NZ@Lys78 | 29.3 | 19.8 | 50.9 | | --- | --- | --- | --- | --- | --- | --- | --- | | OP@G20-NZ@Lys80 | 42.9 | 12.7 | 44.4 | OP@G20-NZ@Lys80 | 46.3 | 17.7 | 36.0 | | OP@A22-NH@Arg86 | 0.7 | 63.7 | 35.7 | OP@A22-NH@Arg86 | 0.6 | 66.0 | 33.4 | | OP@C23-NH@Arg100 | 2.1 | 51.9 | 46.0 | OP@C23-NH@Arg100 | 10.8 | 31.7 | 57.5 | | OP@T13(chain2)-NH@Arg100 | 2.9 | 56.1 | 41.1 | OP@T12(chain1)-NH@Arg100 | 20.4 | 14.7 | 64.9 | | OP@A22(chain2)-NH@Arg100 | 28.7 | 7.2 | 64.1 | OP@T13(chain1)-NH@Arg100 | 16.1 | 32.3 | 51.5 | | OP@A21(chain2)-NZ@Lys101 | 13.5 | 52.9 | 33.6 | OP@A21(chain1)-NZ@Lys101 | 17.8 | 60.6 | 21.6 | | | | | | | | |
| holo-PC4-3 | | | | | | | |
| OP@G8-NH@Arg75 | 15.6 | 55.3 | 29.0 | OP@G8-NH@Arg75 | 11.4 | 63.3 | 25.4 |
| O2@T4-NZ@Lys78 | 31.4 | 1.3 | 67.3 | OP@T7-NZ@Lys78 | 41.0 | 21.9 | 37.1 |
| O2@T5-NZ@Lys78 | 21.6 | 72.6 | 5.8 | OP@G28-NZ@Lys80 | 23.3 | 29.9 | 46.8 |
| OP@G28-NZ@Lys80 | 46.3 | 18.1 | 35.3 | OP@A26-NH@Arg86 | 7.1 | 0.4 | 93.5 |
| OP@A29-NZ@Lys80 | 8.2 | 31.6 | 60.2 | OP@A26(chain2)-NH@Arg100 | 43.0 | 16.0 | 40.9 |
| OP@A27-NH@Arg86 | 4.2 | 73.1 | 22.7 | OP@A26(chain2)-NH@Lys101 | 33.7 | 22.9 | 43.4 |
| OP@A26(chain2)-NH@Arg100 | 1.3 | 89.6 | 9.1 |  |  |  |  |
| OP@A27(chain2)-NZ@Lys101 | 2.9 | 79.9 | 17.2 |  |  |  |  |
| holo-PC4-4 | | | | | | | |
| OP@G20-NZ@Lys78 | 2.4 | 69.0 | 28.6 | OP@G20-NZ@Lys78 | 3.3 | 30.6 | 66.1 |
| OP@G14-NZ@Lys80 | 43.9 | 4.0 | 52.1 | OP@A21-NZ@Lys78 | 19.7 | 31.2 | 49.1 |
| OP@A21-NZ@Lys80 | 9.5 | 50.3 | 40.2 | OP@A21-NZ@Lys80 | 44.0 | 18.2 | 37.9 |
| OP@A22-NH@Arg86 | 2.3 | 0.0 | 97.7 | OP@A24-NH@Arg86 | 1.2 | 30.1 | 68.7 |
| OP@C23-NH@Arg86 | 11.6 | 0.0 | 88.4 | O2@T10(chain1)-NH@Arg100 | 18.1 | 51.4 | 30.5 |
| OP@C23(chain2)-NH@Arg100 | 1.2 | 89.2 | 9.5 | O4@T9(chain1)-NZ@Lys101 | 19.0 | 0.0 | 81.0 |
| O4@T9(chain2)-NZ@Lys101 | 13.6 | 0.0 | 86.4 | OP@A22(chain1)-NZ@Lys101 | 4.1 | 62.9 | 33.0 |
| OP@A22(chain2)-NZ@Lys101 | 5.4 | 77.2 | 17.4 |  |  |  |  |

References.

(1) Werten, S.; Moras, D., A global transcription cofactor bound to juxtaposed strands of unwound DNA, *Nat. Struct. Mol. Biol.* **2006,** *13* (2), 181-182.
